# Supplementary material
Source: PubMed Central journal article supplement (PMC6187152)
Supplement: pnas.1801379115.sapp.pdf [file pnas.1801379115.sapp.pdf]

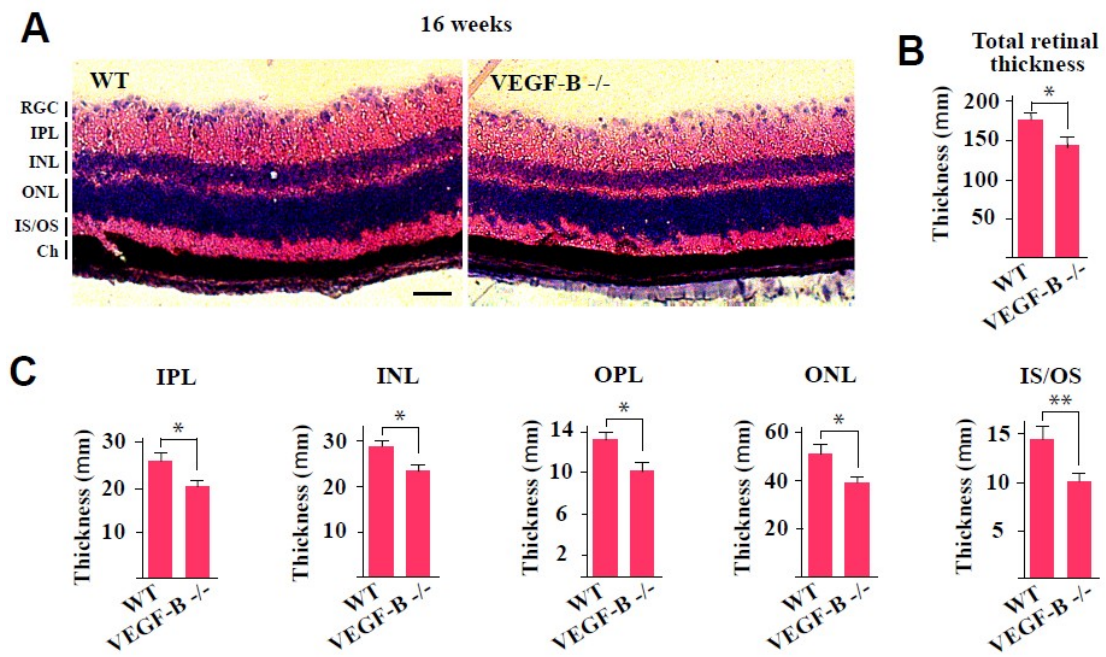

**Fig.S1. Genetic deletion of *Vegf-b* leads to retinal degeneration in 16 week-old *Vegf-b*<sup>-/-</sup> mice**

(A-C) H&E staining shows that the thickness of the retinal layers of 16 week-old *Vegf-b*<sup>-/-</sup> mice was significantly reduced ( $n = 8$ ,  $P < 0.05$ ), including the retinal ganglion cell layer (RGC), choroid, inner segment/outer segment (IS/OS), outer plexiform layer (OPL), outer nuclear layer (ONL), inner nuclear layer (INL) and inner plexiform layer (IPL,  $n = 8$ ,  $P < 0.01$  or  $0.05$ ). Scale bar: 50  $\mu\text{m}$

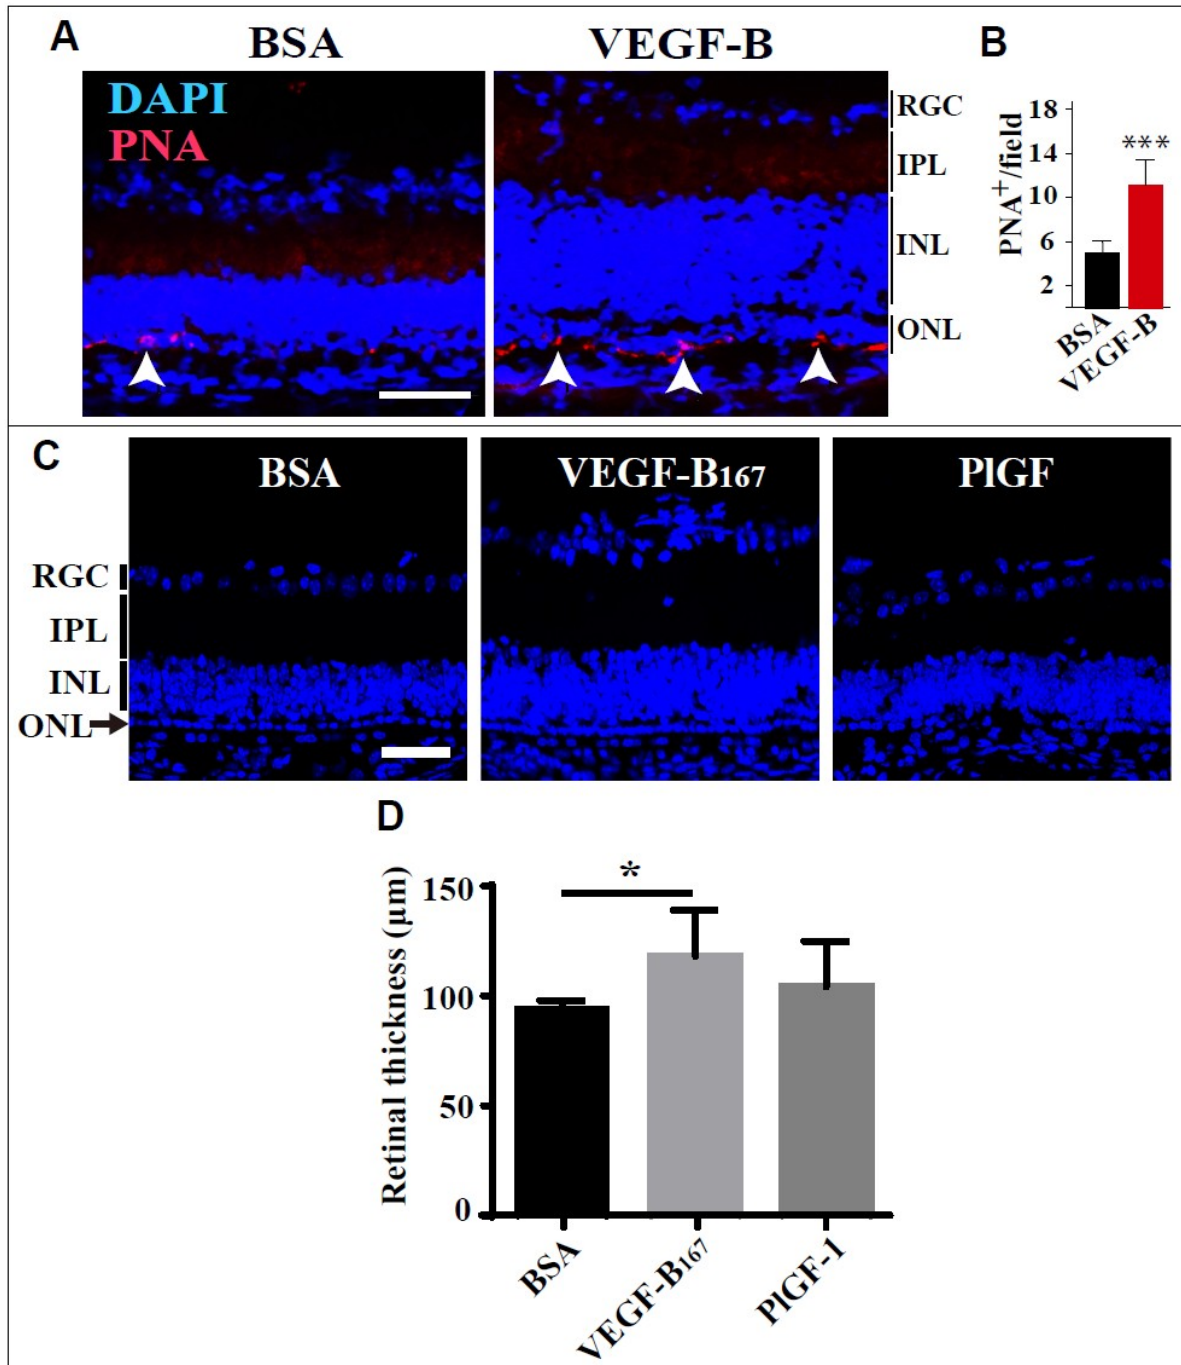

**Fig. S2. VEGF-B treatment rescues retinal degeneration in rd1 mice**

(A, B) Peanut agglutinin (PNA) staining reveals that in rd1 mice, intravitreal injection of VEGF-B at P11 significantly resulted in more PNA<sup>+</sup> cones after VEGF-B treatment (n = 8, P < 0.001, arrow heads). (C, D) VEGF-B treatment (250 ng/eye) increased retinal thickness in rd1 mice (n = 6, P < 0.05). However, PIGF (250 ng/eye) did not show such an effect. Scale bars: 50 μm

Choroids of rd1 mice

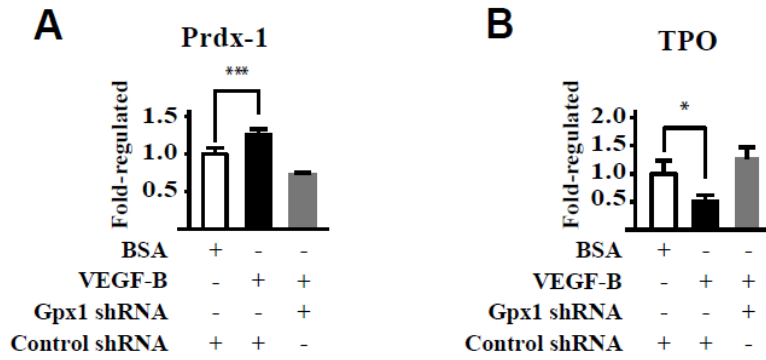

**Fig. S3. Gpx1 is required for the regulatory effect of VEGF-B.**

(A) In the choroids of the rd1 mice, real-time PCR shows that Gpx1 knockdown diminished the upregulatory effect of VEGF-B on the expression Prdx5. (B) In the choroids of the rd1 mice, real-time PCR shows that Gpx1 knockdown diminished the inhibitory effect of VEGF-B on the expression TPO (n = 8,  $P < 0.001$  or 0.05).

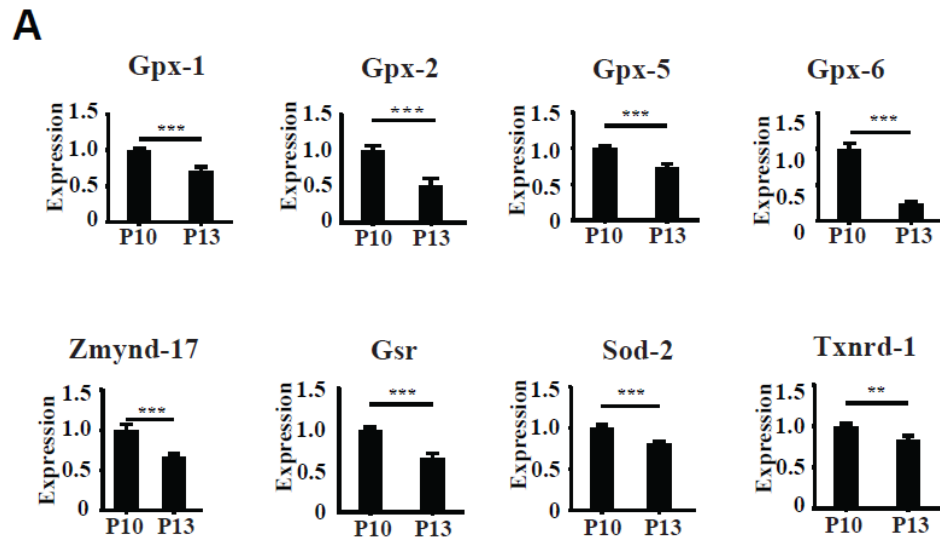

**Fig. S4. Decreased expression of Gpx1 and other anti-oxidative genes in choroids of rd1 mice**

(A) Upon retinal degeneration after postnatal day 10 (P10) in rd1 mice, Gpx1 expression level decreased together with those of some other anti-oxidative genes in the choroids of rd1 mice as shown by real-time PCR (n = 8,  $P < 0.001$  or 0.01).

**A**

**Choroid of rd1 mice**

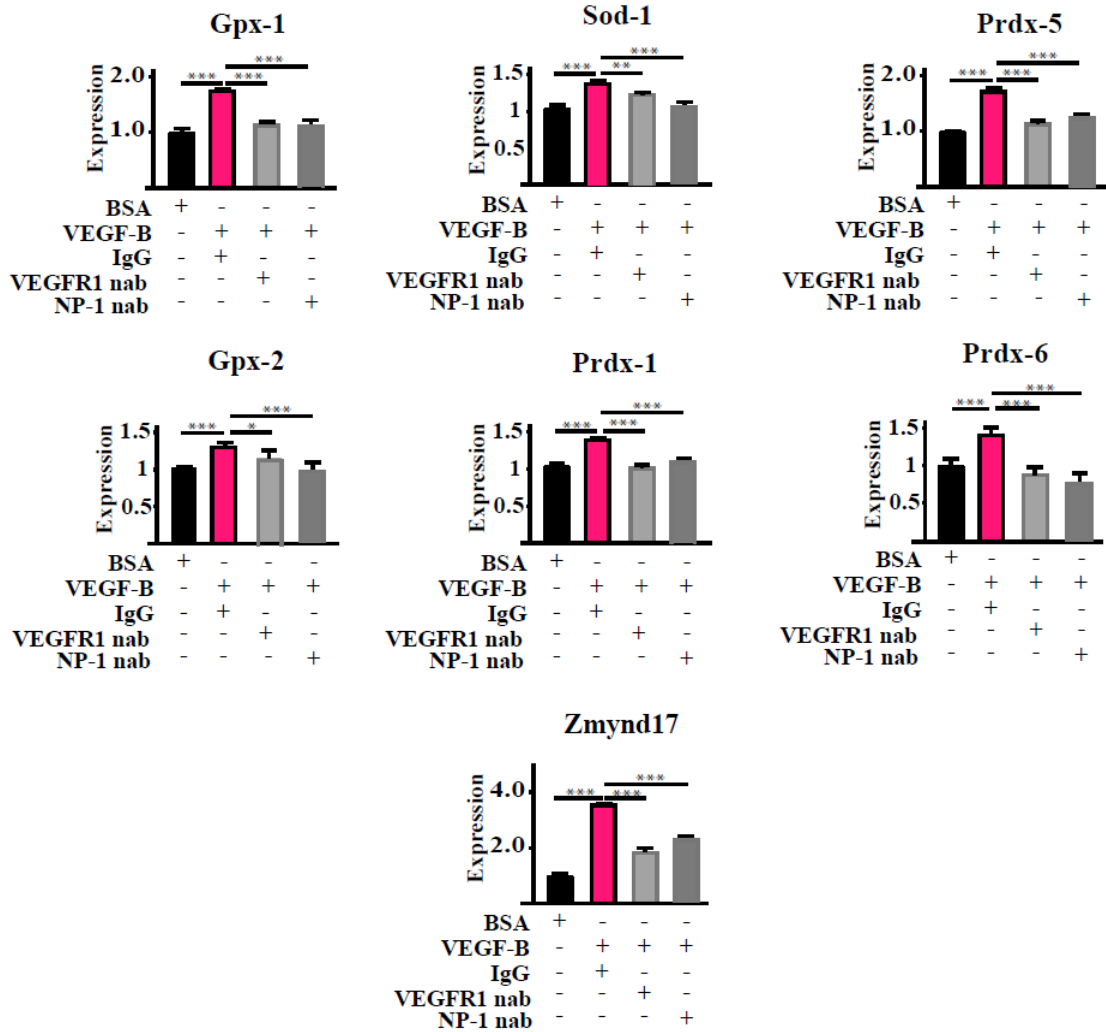

**Fig. S5. The anti-oxidative effect of VEGF-B is mainly fulfilled via VEGFR1**

(A) In the choroids of rd1 mice, real-time PCR results show that co-administration of Vegfr-1 nab completely abolished the upregulatory effect of VEGF-B on the expression of many anti-oxidative genes, while Np1 nab only partially diminished the effect of VEGF-B (n = 6,  $P < 0.001$ , 0.01 and 0.05).

## **SI Appendix**

### **Materials and Methods**

#### **VEGF-B deficient mice and analysis of retinal thickness**

All animal experiments were approved by the animal research ethics committee at the Zhongshan Ophthalmic Center, Sun Yat-Sen University, or by the Animal Care and Use Committee at the NEI/NIH. The animals were handled in accordance with the approved guidelines and regulations. *Vegf-b* deficient mice have been described previously (1, 2).

The procedures for analysis of retinal thickness have been described previously (3). Briefly, the eyes of *Vegf-b* deficient and littermate wild-type control mice were harvested at different ages. To ensure that the same locations of the eyes were analyzed and compared, a mark was placed at 12:00 o'clock position of the corneal limbus of each eye. The eyes were then embedded in Optimal Cutting Temperature (OCT, CrystalgenInc.) compound. Ten micrometer frozen sections were cut in parallel to the 12:00 o'clock meridian through the optic nerve and fixed in 4% paraformaldehyde and H&E stained. Retinal layer thickness was measured in a blinded manner regarding the genotypes at six locations of each eye: 25% (S1), 50% (S2), and 75% (S3) of the distance between the superior pole and the optic nerve, and 25% (I1), 50% (I2), and 75% (I3) of the distance between the inferior pole and the optic nerve. Only the sections with the optic nerve visible were used for analysis. When the images were captured, the whole retinal layer was included in the microscopic field and placed in parallel to the

bottom line to capture the same regions of the retinae. The thickness of the different retinal layers was measured at 200X magnification.

### **VEGF-B neutralizing antibody treatment**

For the treatment of VEGF-B neutralizing antibody, a neutralizing antibody against mouse Vegf-b (2 ug/eye) (4)(or 20 ug/eye, R&D, AF590) or the same amount of control IgG was injected into the vitreous of 8-week old C57Bl6 mice. After 5 or 7 days, the eyes were harvested and sectioned using procedures described above. Apoptotic cells were detected using the terminal deoxynucleotidyl transferase-mediated dUTP-biotin nick end labeling (TUNEL) procedure according to the manufacturer's protocol (Roche Diagnostics). The numbers of TUNEL<sup>+</sup> nuclei per high power field were counted throughout the whole retinal section parallel to the 12:00 o'clock meridian through the optic nerve.

### **Treatment of rd1 mice with VEGF-B protein**

The rd1/rd1 (FVB/NJ) mice as a model for retinitis pigmentosa (5, 6) were obtained from the Jackson Laboratory (Bar Harbor, ME, USA). VEGF-B<sub>167</sub> protein (PeroTech, 500 ng/eye)(7) or the same amount of BSA were injected into the vitreous of postnatal day 11 (P11) mice. The injections were repeated every five days at P16, and P21. At P26, the eyes were harvested and processed as described above. The sections were stained using an H&E method. Retinal thickness was measured at six different locations as described above. Moreover, to test

a dose-response and the specificity of VEGF-B, we have also used a different dose (250 ng/eye) and used PIGF as a control, since it binds the same receptors (VEGFR1 and NP1) as VEGF-B.

### **Immunofluorescence staining and TUNEL assay**

To visualize the rod and cone photoreceptors, the sections were incubated in rod photoreceptor-specific monoclonal mouse antibody rho-4D2 (1/100 dilution in blocking buffer; kindly provided as a gift by Dr. Robert Molday, University of British Columbia, Vancouver BC, Canada) (8) and peanut agglutinin (PNA) respectively. DAPI (Sigma) was used for nuclear staining. Sections were analyzed using Imager microscope (Carl Zeiss). TUNEL staining was performed according to the manufacturer's instructions (Roche).

### **PCR array analysis**

The high throughput mouse RT<sup>2</sup>profiler™ PCR array (SuperArray, Frederick, MD) was used to investigate the expression of eighty-four oxidative stress and antioxidant defense genes with five housekeeping genes as controls according to the manufacturer's protocol. The complete list of the genes analyzed can be found at [http://www.sabiosciences.com/rt\\_pcr\\_product/HTML/PAMM-065Z.html](http://www.sabiosciences.com/rt_pcr_product/HTML/PAMM-065Z.html). Briefly, total RNA was extracted from VEGF-B- or BSA-treated retinæ of rd1/rd1 mice (FVB/NJ, Jackson lab) using the Trizol reagent (Invitrogen life technologies) according to the manufacturer's instructions. The extracted RNA was treated with RNeasy MinElute™ Cleanup Kit (Qiagen) to remove any potential contamination of genomic DNA according to the manufacture's protocol. One microgram of total RNA was reverse transcribed into cDNA using the RT<sup>2</sup> PCR array First Strand Kit (SuperArray Bioscience Corporation, Frederick, MD). The PCR array was performed using an ABI 7500 system (Applied Biosystems) and the follow program: an initial 10-minute step at 95°C followed by 40 cycles of 95°C for 15 seconds and 60°C for 1 minute. The data were analyzed using the web portal



(<http://www.sabiosciences.com/pcr/arrayanalysis.php>) and the gene expression fold changes determined using the  $2^{-\Delta\Delta CT}$  method (9).

### **Microarray assay**

The microarray analysis was performed as described previously (2). Briefly, primary mouse aortic artery smooth muscle cells (SMCs) were treated with human VEGF-B<sub>167</sub> (100 ng/ml, PeproTech) for 6 hours under a hypoxic (1% oxygen) condition. Microarray assay was performed using the Whole Mouse Genome Oligo Microarray (Agilent Technologies). The whole microarray assay, including the treatment of the SMCs with VEGF-B<sub>167</sub>, was repeated twice independently. The threshold of differential gene expression was set at greater than two-fold up-regulation. Analysis of the differentially expressed genes was performed using several different tools, including the WebGestalt, BRB microarray tools and the Ingenuity Pathways Analysis (IPA).

### **Real-time PCR and Gpx1 knockdown**

For the real-time PCR assay, total RNA was isolated using the RNeasy Mini-kit (Qiagen) according to the manufacturer's instruction. 2 µg of total RNA was used for cDNA synthesis using the SuperMix kit (Invitrogen) and used for the real-time PCR reaction using an ABI Prism 7500 HT Sequence Detection System (Applied Biosystems). All experiments were performed in triplicates and repeated at least twice as described previously (2, 10).

To test whether loss of Gpx1 by shRNA knockdown could abolish the effect of VEGF-B, Gpx1 shRNA (Open Biosystems-GE Healthcare, RMM3981-97064816, 1 µg/eye) or the control vector pLKO.1 (Open Biosystems-GE Healthcare, catalog number RHS4080, 1 µg/eye) were injected into the vitreous of P7 rd1/rd1 mice together with the in vivo transfection reagent in vivo-jetPEI™ (Polyplus Transfection). After two days, human recombinant VEGF-B<sub>167</sub> protein (PeproTech, catalog number 96-100-20B-100, 500 ng/eye) was injected

into the vitreous. The retinae were harvested at P11 for real-time PCR analysis. The primers used for real-time PCR are listed in SI Appendix, Tables S1-S3.

### **Western blot**

Western blot was carried out as described previously (10). Briefly, the tissue or cell samples were homogenized in RIPA lysis buffer (50 mM HEPES pH 7.4, 150 mM NaCl, 1% NP-40, 0.5% sodium deoxycholate, 0.1% SDS). The total lysates were separated using a NuPAGE 10% Bis-Tris gel and transferred to a PVDF membrane (Invitrogen). The membranes were incubated with the following antibodies: anti-VEGF-B (MAB751, R&D), anti-Gpx1 (Novus, NBP1-33620), anti-Sod1 (Abnova, PAB1193), anti-Sod2 (AF3419, R&D), Rho-4D2 (8), anti-Zmynd17 (abcam, ab170480), anti-Prdx1 (abcam, ab15571), anti-Gpx2 (Novus, NBP1-32002), anti-alpha-tubulin (Sigma, T6074-200UL) and monoclonal anti- $\beta$ -actin-Peroxidase (A3854, Sigma). The secondary antibodies included an HRP-conjugated donkey anti-mouse IgG or HRP-conjugated donkey-anti-goat IgG (R&D). Membranes were developed and visualized using an enhanced chemiluminescent western blot substrate (Pierce-Thermo Fisher Scientific Inc.).

### **Cell culture and MTT assay**

The mouse photoreceptor-derived 661W cells (ATCC) were cultured in Dulbecco's modified Eagle's medium (ScienCell, 09221) containing 10% fetal bovine serum (ScienCell, 0025) and 1% penicillin/streptomycin. The cells were seeded at 10000 cells/well in 6-well plates and cultured overnight. For Gpx1 knockdown, about 75 % confluent 661W cells (with 10% FBS) are transfected with siCTL or siGpx1 (SR405153, OriGene) for 24 hours. After 24 hours, the cells were changed to serum-free medium and treated with VEGF-B<sub>167</sub> protein (PeproTech, 100-20B, 100 ng/ml) or BSA (100 ng/ml) for two hours. Then, H<sub>2</sub>O<sub>2</sub> (sigma, 323381) was added to a final concentration of 0.1% for 20 minutes, after which the medium was discarded and changed to serum-free medium with VEGF-B<sub>167</sub> protein (100 ng/ml) or BSA (100 ng/ml) for 24 hours, and MTT

(3-(4, 5-dimethylthiazol-2-yl) 2, 5-diphenyltetrazolium bromide, Sigma) assay was performed to check cell viability according to the manufacturer's instruction.

### **Statistics**

Two tailed Student's t-test was used for statistical analysis. Difference was considered statistically significant when  $P < 0.05$ . The data are represented as mean  $\pm$  SEM of the number of the determinations. Assays using cultured cells were performed in triplicates.

## References

1. Sun Y, *et al.* (2004) Increased severity of cerebral ischemic injury in vascular endothelial growth factor-B-deficient mice. *Journal of cerebral blood flow and metabolism : official journal of the International Society of Cerebral Blood Flow and Metabolism* 24(10):1146-1152.
2. Li Y, *et al.* (2008) VEGF-B inhibits apoptosis via VEGFR-1-mediated suppression of the expression of BH3-only protein genes in mice and rats. *The Journal of clinical investigation* 118(3):913-923.
3. He C, *et al.* (2014) Vasoprotective effect of PDGF-CC mediated by HMOX1 rescues retinal degeneration. *Proceedings of the National Academy of Sciences of the United States of America* 111(41):14806-14811.
4. Mould AW, *et al.* (2008) Prophylactic but not therapeutic activity of a monoclonal antibody that neutralizes the binding of VEGF-B to VEGFR-1 in a murine collagen-induced arthritis model. *Rheumatology (Oxford, England)* 47(3):263-266.
5. Otani A, *et al.* (2002) Bone marrow-derived stem cells target retinal astrocytes and can promote or inhibit retinal angiogenesis. *Nature medicine* 8(9):1004-1010.
6. Carter-Dawson LD, LaVail MM, & Sidman RL (1978) Differential effect of the rd mutation on rods and cones in the mouse retina. *Investigative ophthalmology & visual science* 17(6):489-498.
7. Scrofani SD, Fabri LJ, Xu P, Maccarone P, & Nash AD (2000) Purification and refolding of vascular endothelial growth factor-B. *Protein science : a publication of the Protein Society* 9(10):2018-2025.
8. Hicks D & Molday RS (1986) Differential immunogold-dextran labeling of bovine and frog rod and cone cells using monoclonal antibodies against bovine rhodopsin. *Experimental eye research* 42(1):55-71.
9. Livak KJ & Schmittgen TD (2001) Analysis of relative gene expression data using real-time quantitative PCR and the 2<sup>-</sup>(-Delta Delta C(T)) Method. *Methods (San Diego, Calif.)* 25(4):402-408.
10. Zhang F, *et al.* (2009) VEGF-B is dispensable for blood vessel growth but critical for their survival, and VEGF-B targeting inhibits pathological angiogenesis. *Proceedings of the National Academy of Sciences of the United States of America* 106(15):6152-6157.

**Table S1. Primers for anti-oxidative genes**

| <b>Gene ID</b> | <b>Gene Symbol</b>                      | <b>Primer sequence</b>  |
|----------------|-----------------------------------------|-------------------------|
| NM_008160      | Gpx1- forward (mouse)                   | GGGACTACACCGAGATGAACG   |
|                | Gpx1- reverse (mouse)                   | CCGCAGGAAGGTAAAGAGC     |
| NM_011434      | SOD1- forward (rat, human and mouse)    | GTGTGCGTGCTGAAGGGCG     |
|                | SOD1- reverse (rat, human and mouse)    | CTTCATTTCCACCTTTGCCC    |
| NM_012021      | Prdx5- forward (rat and mouse)          | GGCAGGCAGAGCAGGCCG      |
|                | Prdx5- reverse (rat, human and mouse)   | GGTGAGGCCTGTGCCATC      |
| NM_177256      | Prdx6-rs1- forward (mouse)              | CGGTTGCCACCCAGTT        |
|                | Prdx6-rs1- reverse (mouse)              | TGCCACGATCTTTCTACGGAC   |
| NM_153162      | Txnrd3- forward (rat, human and mouse)  | GGAAGTTGATCAAGTTGATG    |
|                | Txnrd3- reverse (rat and mouse)         | GGCTGCCTGATGCATCAGC     |
| NM_013671      | Sod2- forward (rat, human and mouse)    | CAGATCATGCAGCTGCACC     |
|                | Sod2- reverse (rat, human and mouse)    | CATTCTCCCAGTTGATTACATTC |
| NM_010343      | Gpx5- forward (mouse)                   | GGGATGTAAATGGTGAAAACGA  |
|                | Gpx5- reverse (mouse)                   | CCAGCGCATGACAGGGAT      |
| NM_029104      | Zmynd17- forward (rat, human and mouse) | GGCACTGTAAGAGGTGCAG     |
|                | Zmynd17- reverse (rat and mouse)        | CGTGGGAAGCACCAACCAC     |
| NM_030677      | Gpx2- forward (rat, human and mouse)    | GTGCTGATTGAGAATGTGGC    |
|                | Gpx2- reverse (rat, human and mouse)    | CTATGAGGAACTTCTCAAAGTTC |
| NM_015762      | Txnrd1- forward (human and mouse)       | GATGGGGTCTCGGAGGAAC     |
|                | Txnrd1- reverse (rat, human and mouse)  | GTAAGGCAAGGAGAAAAGATC   |
| NM_011034      | Prdx1- forward (rat, human and mouse)   | CACGGAGATCATTGCTTTCAG   |
|                | Prdx1- reverse (rat, human and mouse)   | GGTATCACTGCCAGGTTTCC    |
| NM_145451      | Gpx6- forward (rat, human and mouse)    | GGTGGATTGCAACAAAGGGG    |
|                | Gpx6- reverse (rat and mouse)           | CTTCATGGGATCCCAGAAGAG   |

**Table S2. Primers for oxidative stress genes**

| <b>Gene ID</b> | <b>Gene Symbol</b>                       | <b>Primer sequence</b> |
|----------------|------------------------------------------|------------------------|
| NM_008969      | Ptgs1- forward (rat and mouse)           | GAATGCCACCTTCATCCGAG   |
|                | Ptgs1- reverse (rat and mouse)           | CCAGCACCTGGTACTTAAG    |
| NM_015760      | Nox4- forward (human and mouse)          | CCTCTTCTTTGTCTTCTACATG |
|                | Nox4- reverse (human and mouse)          | GCACAAAGGTCCAGAAATCC   |
| NM_010877      | Ncf2- forward (rat and mouse)            | CAAAGCATCAACAGAGACAAG  |
|                | Ncf2- reverse (rat and mouse)            | GCTGACTGTGGCTGCAGAG    |
| NM_009417      | Tpo- forward (rat and mouse)             | GGAGGGAGACCTTCCCAC     |
|                | Tpo- reverse (rat and mouse)             | GTGTCCACCTGCAAATTAC    |
| NM_133819      | Ppp1r15b- forward (mouse)                | CCGAGTGCAGATGAAGCAG    |
|                | Ppp1r15b- reverse (rat, human and mouse) | GAATTCGTTTCTGGAACCTGC  |

**Table S3. Primers for Flt1**

| <b>Gene ID</b> | <b>Gene Symbol</b>    | <b>Primer sequence</b> |
|----------------|-----------------------|------------------------|
| NM_010228      | Flt1- forward (mouse) | GCTCTGATGACCGAACTCAA   |
|                | Flt1- reverse (mouse) | ATTCCACGATCACCATCAGA   |
